# Supplementary material
Source: PubMed Central journal article supplement (PMC4025648)
Supplement: ml2002482_si_001.pdf [file ml2002482_si_001.pdf]

## Supporting information

# Discovery and Development of Potent LFA-1/ICAM-1 Antagonist SAR 1118 as an Ophthalmic Solution for Treating Dry Eye

Min Zhong,<sup>\*,†,§</sup> Thomas R. Gadek,<sup>\*,‡</sup> Minna Bui,<sup>†</sup> Wang Shen,<sup>†</sup> John Burnier,<sup>‡</sup> Kenneth J. Barr,<sup>†</sup>  
Emily J. Hanan,<sup>†</sup> Johan D. Oslob,<sup>†</sup> Chul H. Yu,<sup>†</sup> Jiang Zhu,<sup>†</sup> Michelle R. Arkin,<sup>†</sup> Marc J.  
Evanchik,<sup>†</sup> W. Mike Flanagan,<sup>†</sup> Ute Hoch,<sup>†</sup> Jennifer Hyde,<sup>†</sup> Saileta Prabhu,<sup>†</sup> Jeffrey A.  
Silverman,<sup>†</sup> and Jasmin Wright<sup>†</sup>

<sup>†</sup>Sunesis Pharmaceuticals, Inc., 395 Oyster Point Boulevard, Suite 400, South San Francisco, California 94080, United States

<sup>‡</sup>SARcode Bioscience, Inc., 1000 Marina Boulevard, Suite 250, Brisbane, California 94005, United States

### Table of contents

1. Process chemistry route to SAR 1118 (Scheme 1)
2. General information of SAR 1118
3. Spectroscopic data of SAR 1118
  - a. Thermogravimetric Analysis (TGA) analysis spectrum (Figure 1)
  - b. Differential scanning calorimetry (DSC) analysis spectrum (Figure 2)
  - c. X-ray pattern diffraction (XRPD) analysis spectrum (Figure 3)
  - d. Fourier Transform Infrared Spectroscopy (FTIR) spectrum (Figure 4)
  - e. Electron spray ionization Mass Spectroscopy (ESI-MS) spectrum (Figure 5)
  - f. <sup>1</sup>H Nuclear magnetic resonance (NMR) spectrum (Figure 6)
  - g. <sup>13</sup>C Nuclear magnetic resonance (NMR) spectrum (Figure 7)
4. Detailed information of the HuT 78 T-cell adhesion assay
5. Detailed information of the Jurkat T-cell adhesion assay

**Scheme 1.** Process chemistry route to SAR 1118<sup>a,1</sup>

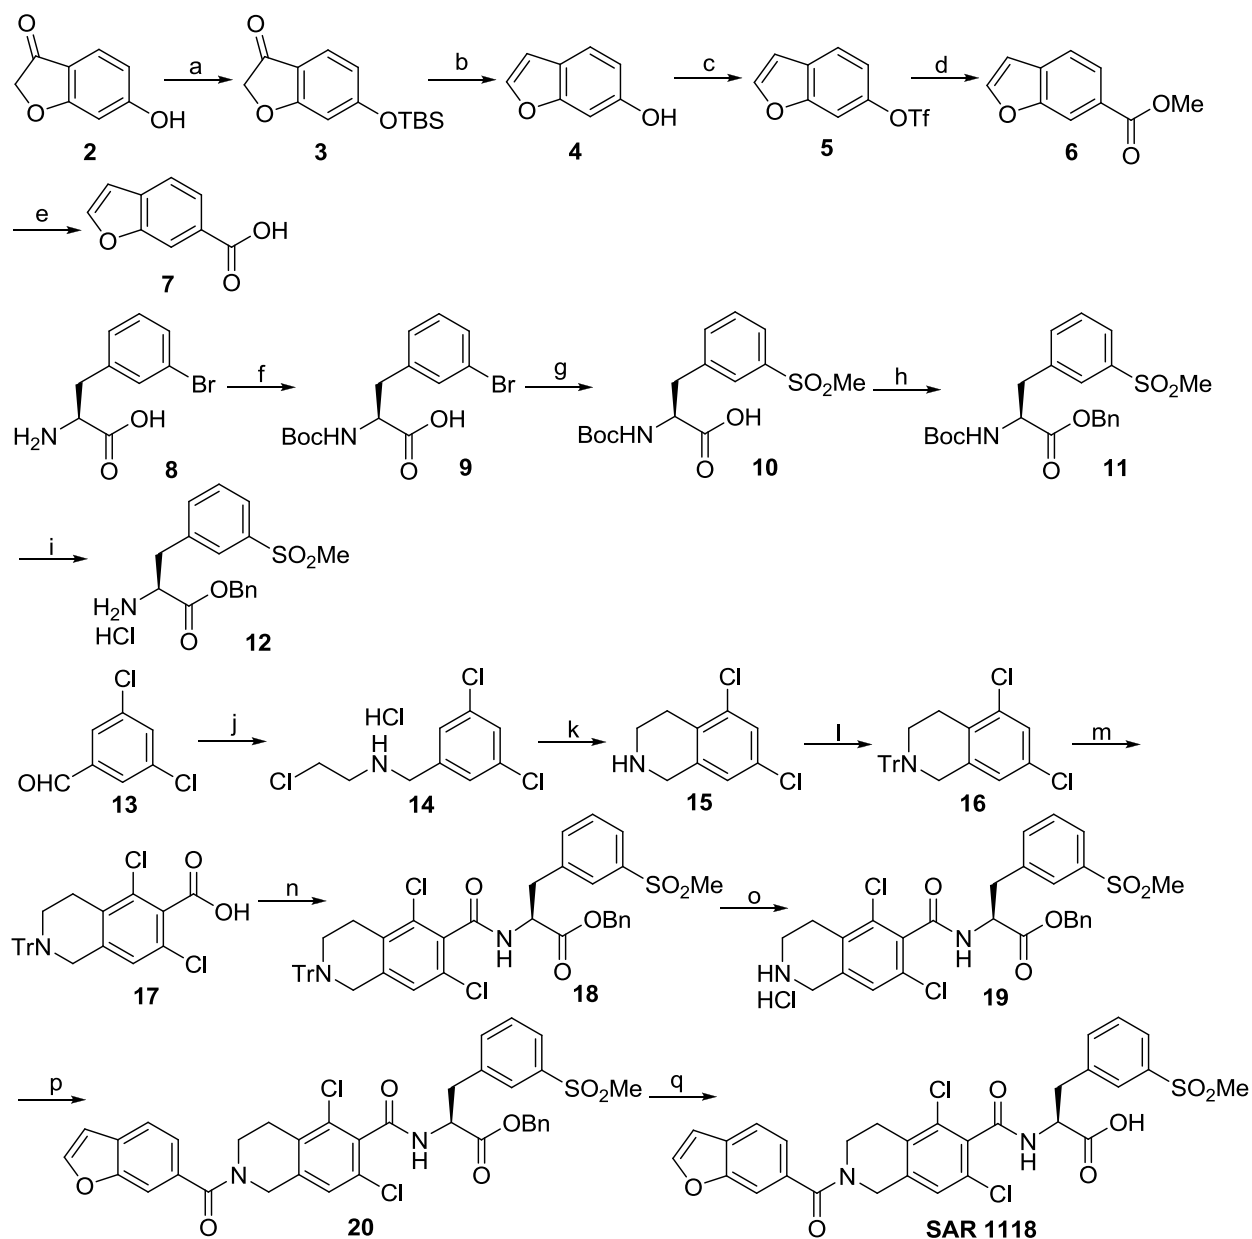

<sup>a</sup>Reagents and conditions: (a) TBDMSCl, Et<sub>3</sub>N, acetone, rt, 79% yield; (b) NaBH<sub>4</sub>, MeOH, rt, overnight; acetone, rt, 2 hr; 4 N aq. HCl, THF, Ar, dark, rt, overnight, 95% yield; (c) Tf<sub>2</sub>NPh, DCM, rt, 72 hr, 69% yield; (d) Pd(OAc)<sub>2</sub>, dppp, DMF/MeOH, CO (8 bar), 70 °C, 6 hr, 91% yield; (e) LiOH, MeOH/H<sub>2</sub>O, rt, overnight; 1 N aq. HCl, 97% yield; (f) Boc<sub>2</sub>O, NaHCO<sub>3</sub>, dioxane/H<sub>2</sub>O, rt, overnight, 98% yield; (g) NaOS(O)Me, CuI, Cs<sub>2</sub>CO<sub>3</sub>, L-Proline, DMSO, 100 °C, 9 hr, 96% yield; (h) BnOH, EDCI, DMAP, DMF, rt, overnight, > 98% yield; (i) 4 N HCl in dioxane, DCM, 0 °C, overnight, 94% yield; (j) 1-chloro-2-aminoethane, NaCNBH<sub>3</sub>, MeOH, rt, overnight, 35% yield; (k) AlCl<sub>3</sub>, 185 °C, 91% yield; (l) TrCl, DIEA, DCM, rt, 4 hr, 89% yield; (m) *n*-BuLi, TMEDA, THF, -78 °C to rt; CO, -78 °C to rt, 75% yield; (n) **12**, HATU, TEA, DMF, DMF, rt, 18 hr, 70% yield; (o) 4 N HCl in dioxane, rt, 2 hr, 95% yield; (p) acid chloride of **7**, DIEA, DCM, 0 °C, 1 hr, > 98% yield; (q) 10% Pd/C, HCOOH/Et<sub>3</sub>N (5/2 (v/v)), MeOH/THF (5/1 (v/v)), rt, 4 hr, 95% yield.

## General information of SAR 1118

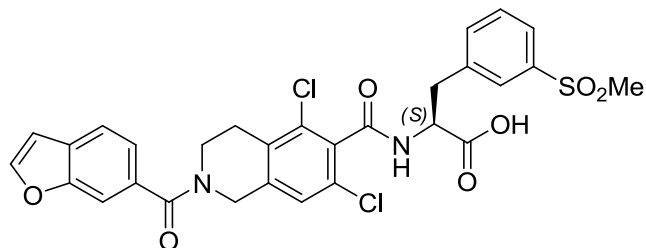

**SAR1118**

Chemical Formula: C<sub>29</sub>H<sub>24</sub>Cl<sub>2</sub>N<sub>2</sub>O<sub>7</sub>S

Molecular Weight: 615.48

SAR 1118 is a white to off-white solid crystallized from methylethylketone. m.p. 154.4 °C;  $[\alpha]_D^{25} = -5.0^\circ$  (c = 1% (w/w) in MeOH); solubility 90 µg/mL in water at 25 °C (parent); FT-IR (KBr):  $\nu_{\max}$  3427, 3302, 3030, 2923, 1727, 1659, 1294, 1140, 826, 764 cm<sup>-1</sup>; ESI-MS:  $m/z$  615.1 [M+1]<sup>+</sup>, 637.0 [M+Na]<sup>+</sup>; <sup>1</sup>H NMR (300 MHz, *d*<sup>6</sup>-DMSO):  $\delta$  12.90 (bs, 1H), 9.05 (d, *J* = 6.0 Hz, 1H), 8.13 (d, *J* = 1.9 Hz, 1H), 7.73 (m, 4H), 7.57 (m, 1H), 7.41 (bs, 1H), 7.05 (d, *J* = 1.9 Hz, 1H), 4.78 (bm, 3H), 3.63 (bm, 3H), 3.30 (m, 1H), 3.16 (s, 3H), 3.02 (m, 1H), 2.77 (m, 2H) ppm; <sup>13</sup>C NMR (75.5 MHz, *d*<sup>6</sup>-DMSO):  $\delta$  172.1, 169.6, 163.6, 153.7, 147.8, 140.6, 125.7, 106.9, 53.1, 43.6, 36.4, 26.0 ppm; Elemental analysis: calcd. for C<sub>29</sub>H<sub>24</sub>Cl<sub>2</sub>N<sub>2</sub>O<sub>7</sub>S: C 56.6%, H 3.9%, N 4.6%, S 5.2%, Cl 11.5%; found C 55.1%, H 4.0%, N 4.4%, S 5.2%, Cl 11.2%.

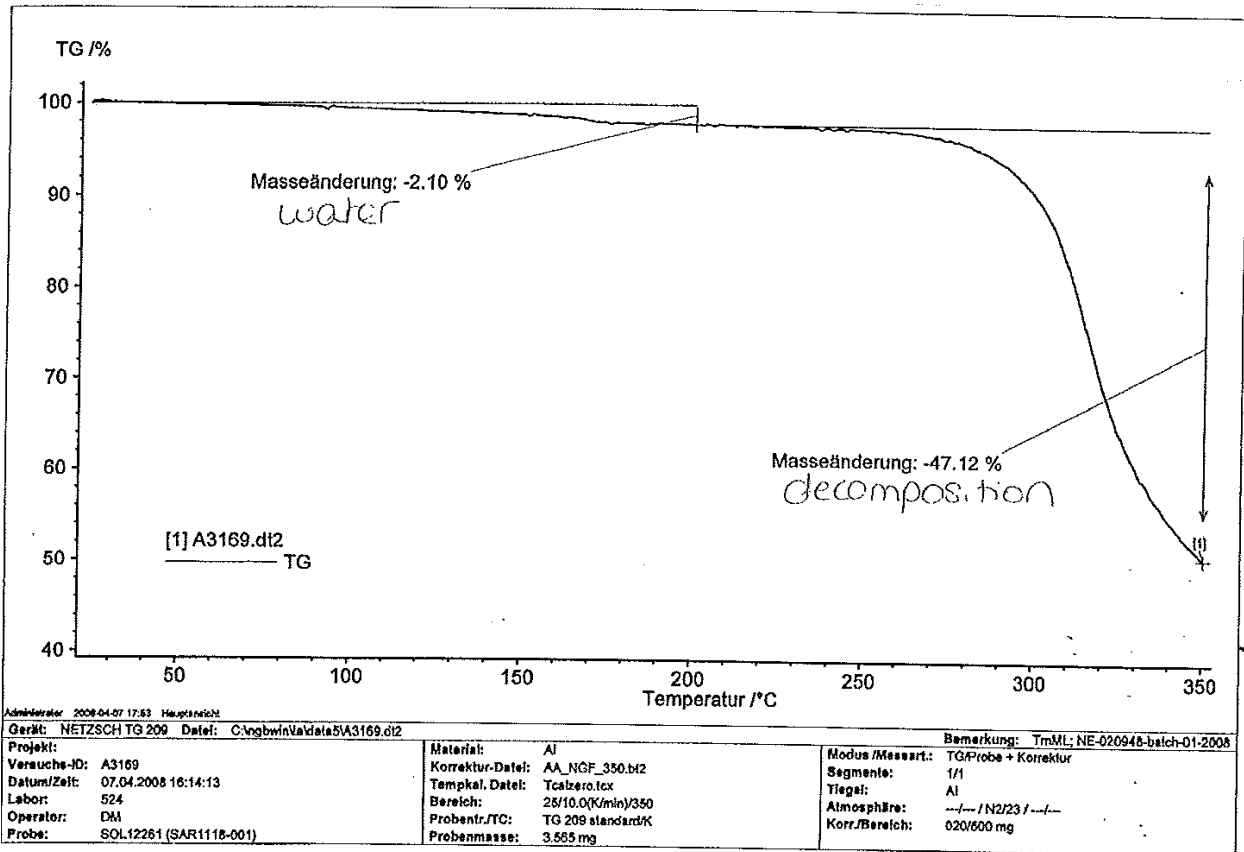

**Fig. 1.** TGA analysis spectrum of SAR 1118 recorded on Netzsch Thermo-Microbalance TG 209 analyzer

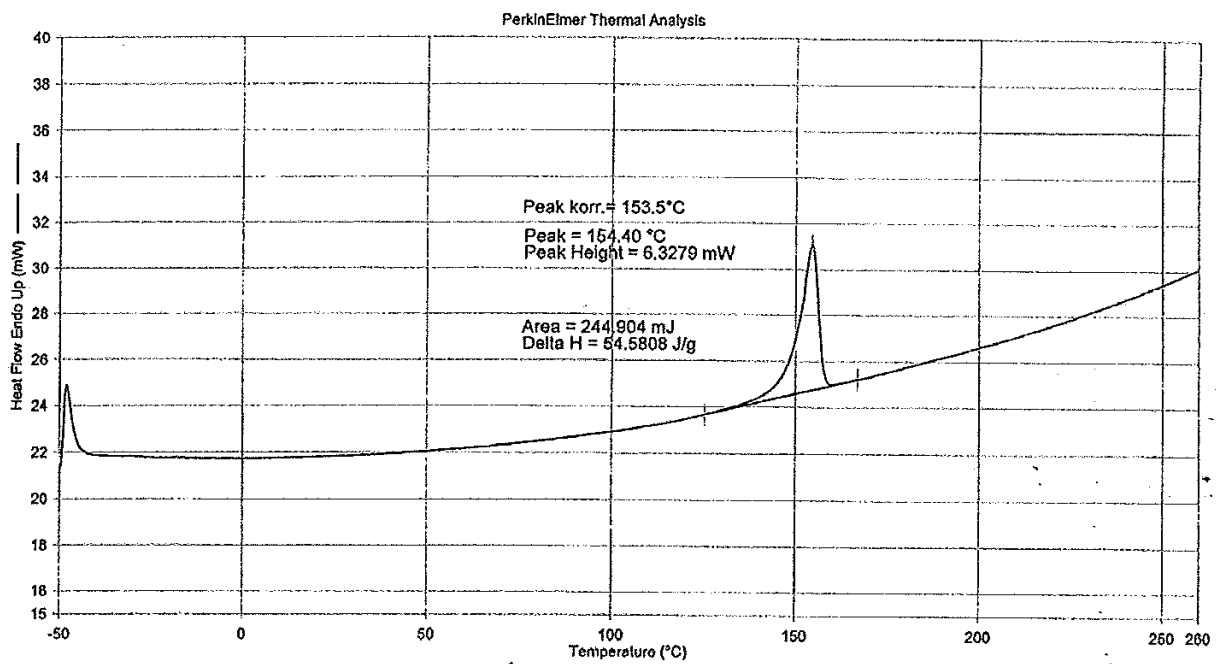

**Fig. 2.** DSC analysis spectrum of SAR 1118 recorded on Perkin Elmer DSC 7

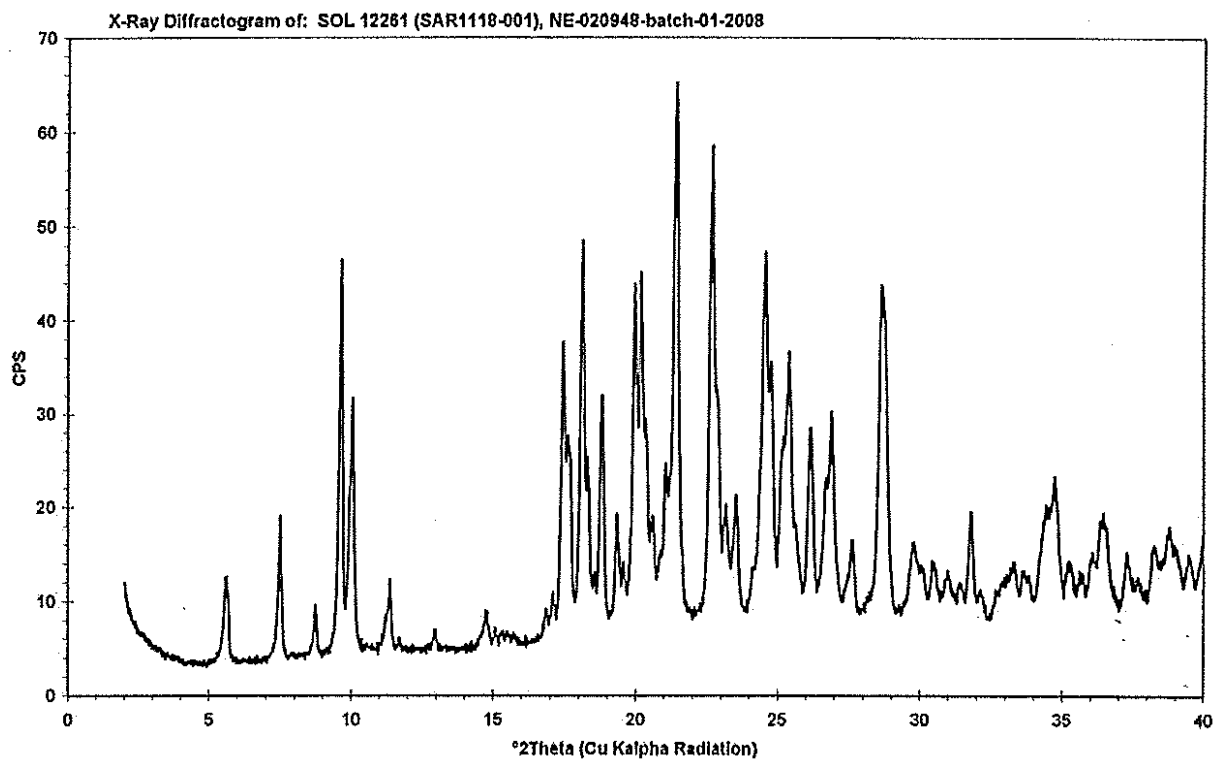

**Fig. 3.** XRPD analysis spectrum of SAR 1118 recorded on Bruker D8 Advance X-ray diffractometer

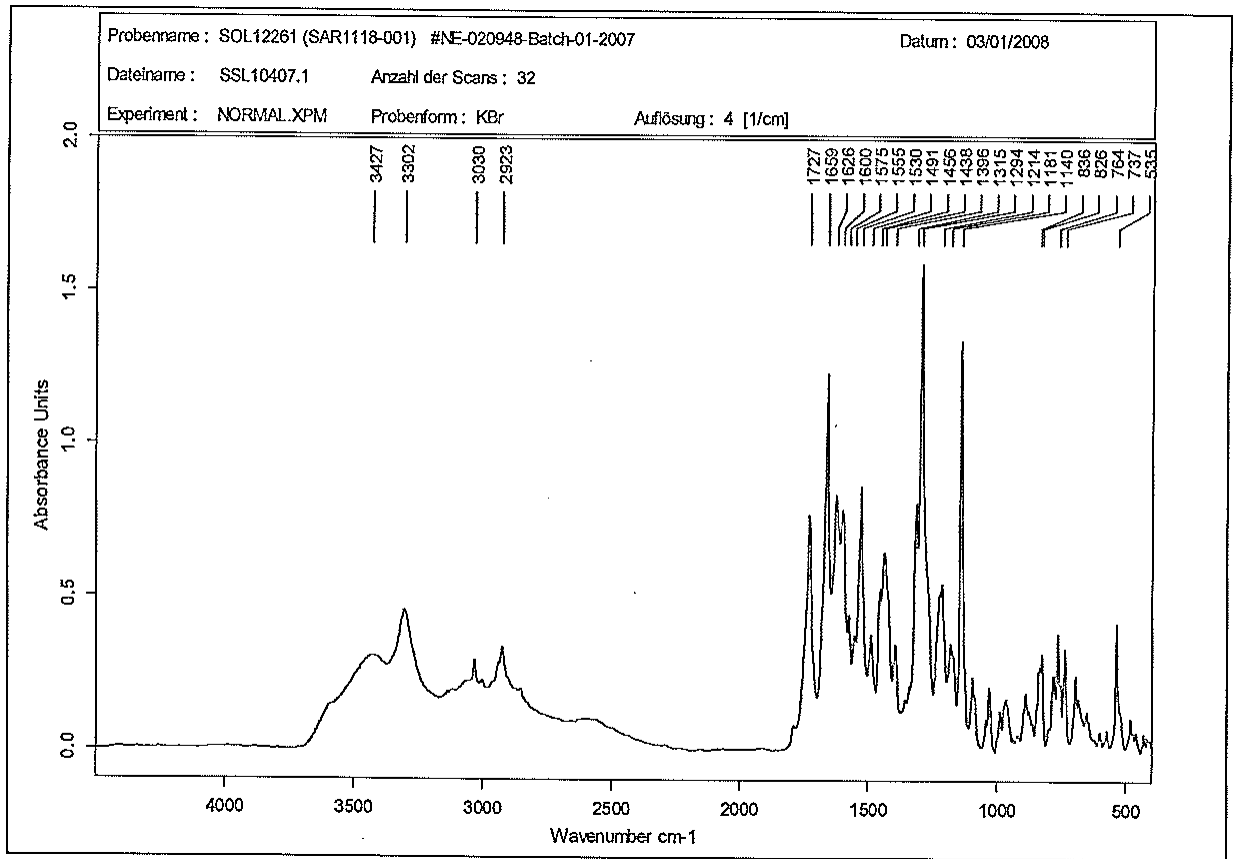

**Fig. 4.** FT-IR spectrum of SAR 1118 recorded on Bruker FT-IR spectrometer IFS48

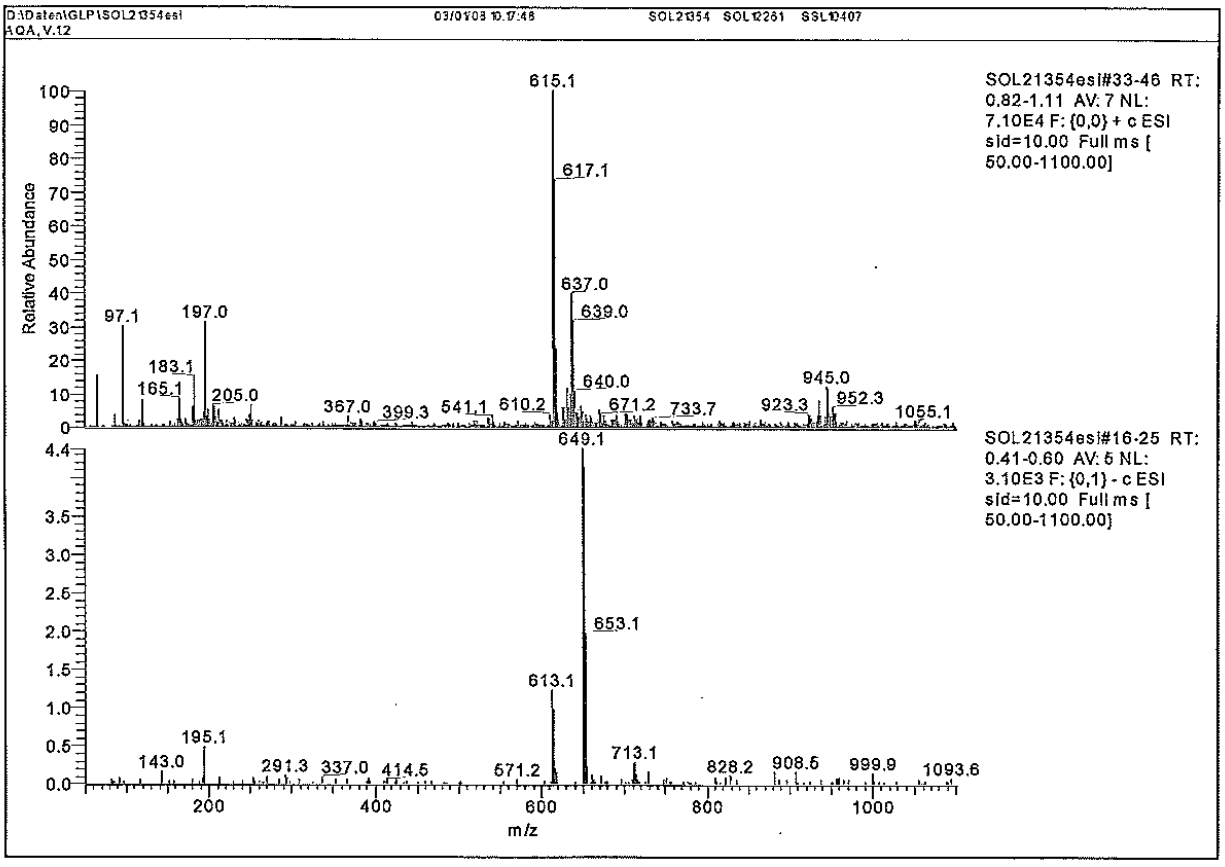

**Fig. 5.** ESI-MS spectrum of SAR 1118 recorded on ThermoQuest Mass spectrometer Finnigan AQA



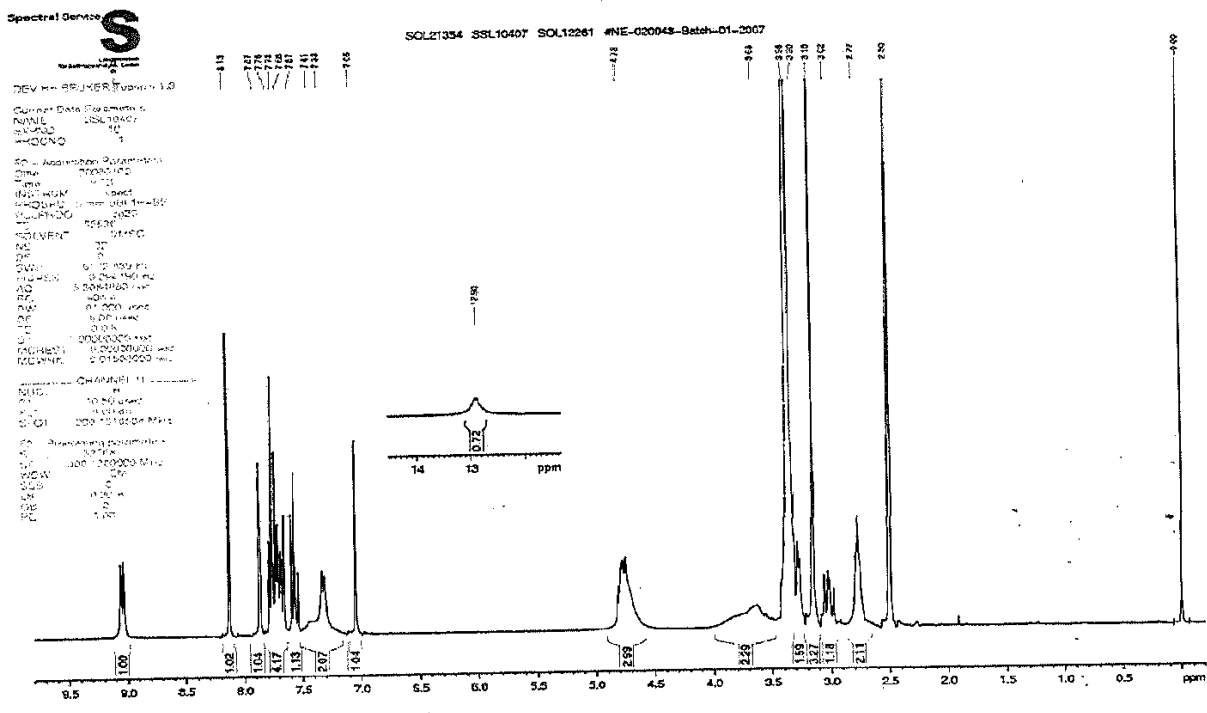

Fig. 6.  $^1\text{H}$  NMR of SAR 1118 recorded on Bruker NMR spectrometer Avance 300

Spectral Services

SOL11354 SSI10407 SOL12261

OGYMSRHCER Topage 1.3

Current Data Parameters  
 NAME S1110407  
 RUNNO 30  
 PROGRAM

72 - Acquisition Parameters  
 Date 11/08/18  
 Time 12:37  
 PROBHD 5 mm QNP 1H/13  
 PULPROG zgpg30  
 TC 300.2  
 SOLVENT CDCl3  
 NS 4  
 DS 4  
 SWH 17000.000 MHz  
 F2 101.625319 MHz  
 F1 125.761360 MHz  
 AQ 0.50000000 sec  
 RG 655.357143  
 DIA 0.77300000 sec  
 DE 0.00100000  
 TE 300.2  
 CH1F2 140.000000 MHz  
 CH1F1 125.761360 MHz  
 CH1 125.761360 MHz  
 CH2 101.625319 MHz  
 LE 1.78 0.50000000 sec  
 ACQUIS 0.50000000 sec  
 MDWAVE 0.51000000 sec

CHANNEL 1  
 NUC1 13C  
 P1 14.000000 sec  
 PL 0.000000 dB  
 PR 1.000000 sec  
 SFO1 125.761360 MHz

CHANNEL 2  
 NUC2 1H  
 P2 1.000000 sec  
 PL 0.000000 dB  
 PR 1.000000 sec  
 SFO2 500.137060 MHz

73 - Processing Parameters  
 SI 32768  
 SF 300.137060 MHz  
 WDW EM  
 SFO 300.137060 MHz  
 LB 1.00 Hz  
 GB 0  
 PC 1.40

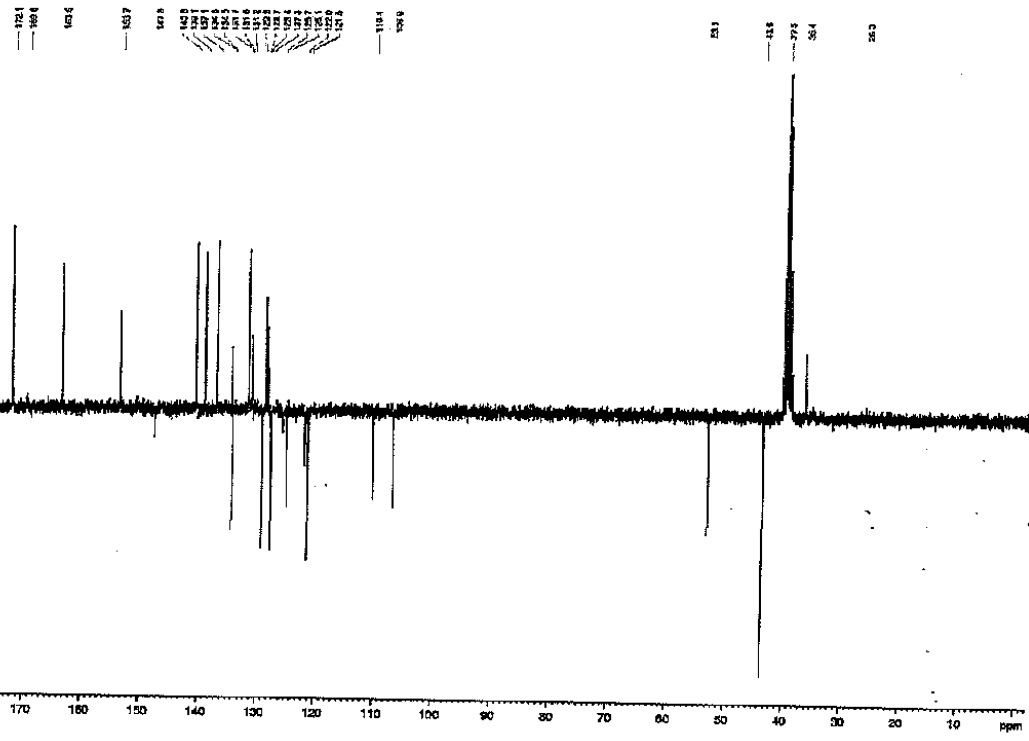

### **Detailed information of the HuT 78 T-cell adhesion assay (cell attachment assay)<sup>2</sup>**

The HuT 78 T-cell adhesion assay is performed using a human T-lymphoid cell line HuT 78 (ATCC TIB-161). Goat anti-HuIgG(Fc) is diluted to 2 µg/mL in PBS and 96-well plates are coated with 50 µL/well at 37 °C for 1 hr. Plates are washed with PBS and blocked for 1 hr at rt with 1% BSA in PBS. 5 domain ICAM-Ig is diluted to 100 ng/mL in PBS and 50 µL/well was added to the plates O/N at 4 °C. HuT 78 cells are centrifuges at 100 g and the cell pellet is treated with 5 mM EDTA for 5 min at 37 °C in a 5% CO<sub>2</sub> incubator. Cells are washed in a mixture of 0.14 M NaCl, 0.02 M Hepes, 0.2% glucose and 0.1 mM MnCl<sub>2</sub> (assay buffer) and centrifuged. The cells are re-suspended in assay buffer to 3.0 x 10<sup>6</sup> c/mL. Compounds are diluted in assay buffer to a 2x final concentration and pre-incubated with HuT 78 cells for 30 min at rt. 100 µL/well of cells and compounds are added to the plates and incubated at rt for 1 hr. 100 µL/well PBS is added and the plates are sealed and centrifuged at 100 g for 5 min. Unattached cells are flicked out of the plate and excess PBS is blotted on a paper towel. 60 µL/well *p*-nitrophenyl *n*-acetyl-β-D-glucosaminide (0.257 g to 100 mL citrate buffer) is added to the plate and incubated for 1.5 hr at 37 °C. The enzymatic reaction is stopped with the addition of 90 µL/well 50 mM glycine/5 mM EDTA and read on a plate reader at 405 nM. HuT 78 cell adhesion to 5 domain ICAM-Ig is measured using the *p*-nitrophenyl *n*-acetyl-β-D-glucosaminide method.<sup>3</sup>

### Detailed information of the Jurkat T-cell adhesion assay (cell attachment assay)<sup>4</sup>

To evaluate the ability of SAR 1118 to inhibit the attachment of Jurkat cells to intercellular adhesion molecule (ICAM)-1 *in vitro*, 100 mM stock solutions of SAR 1118 and a positive control (Compound A shown below)<sup>5-6</sup> were prepared in an aqueous solution of dimethylsulfoxide (1:1 (v/v)), respectively, and then diluted by adding assay medium to achieve and maintain the desired concentration throughout the assay. The Jurkat cells were labeled with an 8  $\mu$ M solution of 2',7'-bis-(2-carboxyethyl)-5-(and-6)-carboxyfluorescein in growth medium at rt for 15 min. Labeled cells were incubated in 70  $\mu$ L of assay medium in each well of a 96-well plate at 500,000 cells per well with 70  $\mu$ L of SAR 1118 or the positive control in assay medium at 37 °C for 30 min. A 100  $\mu$ L aliquot of this fluorescence-labeled Jurkat cell suspension was allowed to settle in the presence of SAR 1118 or the positive control in wells of a 96-well plate coated with recombinant human ICAM-1 expressed as an Fc chimera (R&D Systems, Minneapolis, MN) at 37 °C for 1 hr. A dose titration of each test compound was run ( $10^{-11}$  –  $10^{-6}$  M) in two separate lanes on a single plate, and the assay was replicated on a second, separate plate (**Figure 8**). Non-adherent cells were removed by washing and centrifugation at 100 g for 1 min. Adherent cells were quantitated as the intensity of adherent fluorescence, and the IC<sub>50</sub> values were calculated by using a standard four-parameter logistic nonlinear regression analysis of the data (GraphPad Software Inc., San Diego, CA). The reported IC<sub>50</sub> is the average of data for two plates.

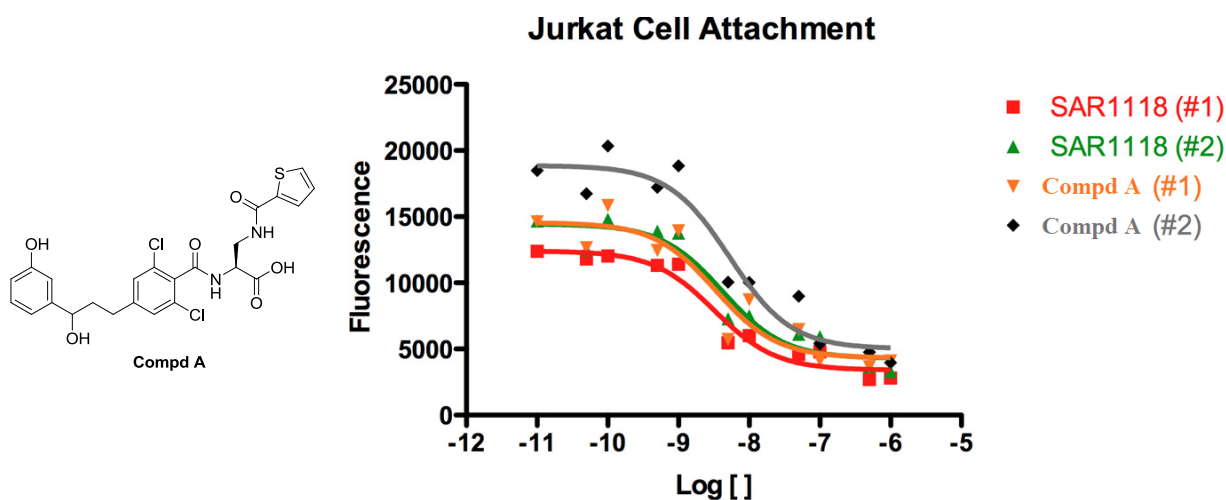

**Fig. 8.** Titration curves of SAR 1118 and Compound A in the Jurkat T-cell adhesion assay

## References

1. Burnier, J.; Gadek, T.; Naud, F. Crystalline pharmaceutical and methods of preparation and use. *US Patent Appl.* **2009/0298869**.
2. Shen, W.; Barr, K. J.; Oslob, J. D.; Zhong, M. Modulators of cellular adhesion. *WIPO Patent Appl.* **WO2005/044817**.
3. Landergren, U. Measurement of cell numbers by means of the endogenous enzyme hexosaminidase. Applications to detection of lymphokines and cell surface antigens. *J. Immunol. Methods* **1984**, *67*, 379-388.
4. Murphy, C. J.; Bentley, E.; Miller, P. E.; McIntyre, K.; Leatherberry, G.; Dubielzig, R.; Giuliano, E.; Moore, C. P.; Phillips, T. E.; Smith, P. B.; Prescott, E.; Miller, J. M.; Thomas, P.; Scagliotti, R.; Esson, D.; Gadek, T.; O'Neill, C. A. The pharmacologic assessment of a novel lymphocyte function-associated antigen-1 antagonist (SAR 1118) for the treatment of keratoconjunctivitis sicca in dogs. *Invest. Ophthalmol. Vis. Sci.* **2011**, *52*, 3174-3180.
5. Gadek, T. R.; Burdick, D. J.; McDowell, R. S.; Stanley, M. S.; Marsters, J. C. Jr.; Paris, K. J.; Pare, D. A.; Reynolds, M. E.; Ladner, C.; Zioncheck, K. A.; Lee, W. P.; Gribling, P.; Dennis, M. S.; Skelton, N. J.; Yumas, D. B.; Clark, K. R.; Keating, S. M.; Beresini, M. H.; Tilley, J. W.; Presta, L. G.; Bodary, S. C. Generation of an LFA-1 antagonist by the transfer of the ICAM-1 immunoregulatory epitope to a small molecule. *Science* **2002**, *295*, 1086-1089.
6. Keating, S. M., Clark, K. R.; Stefanich, L. D.; Arellano, F.; Edwards, C. P.; Bodary, S. C.; Spencer, S. A.; Gadek, T. R.; Marsters, J. C. Jr.; Beresini, M. H. Competition between intercellular adhesion molecule-1 and a small-molecule antagonist for a common binding site on the  $\alpha 1$  subunit of lymphocyte function-associated antigen-1. *Protein Sci.* **2006**, *15*, 290-303.
